# Supplementary material for: A mitochondrion targetable dimethylphosphorothionate-based far-red and colorimetric fluorescent probe with large Stokes shift for monitoring peroxynitrite in living cells
Source: Royal Society of Chemistry journal article supplement (doi:10.1039/d2ay01614a), 2022-12-02
Supplement: d2ay01614a1.pdf [file d2ay01614a1.pdf]

*Supporting information*

**A mitochondria targetable dimethylphosphorothionate-based far-red and colorimetric fluorescent probe with large Stokes shift for monitoring peroxynitrite in living cells**

Chunxiang Zhang, Xiangyang Zhang, Youming Shen, Zile Zhou\*

Hunan Provincial Key Laboratory of Water Treatment Functional Materials, College of Chemistry and Materials Engineering, Hunan University of Arts and Science, Changde 415000, PR China

---

\*Corresponding author. Fax: 0746-7186115

E-mail address: Zile\_Zhou@163.com (Z. Zhou)

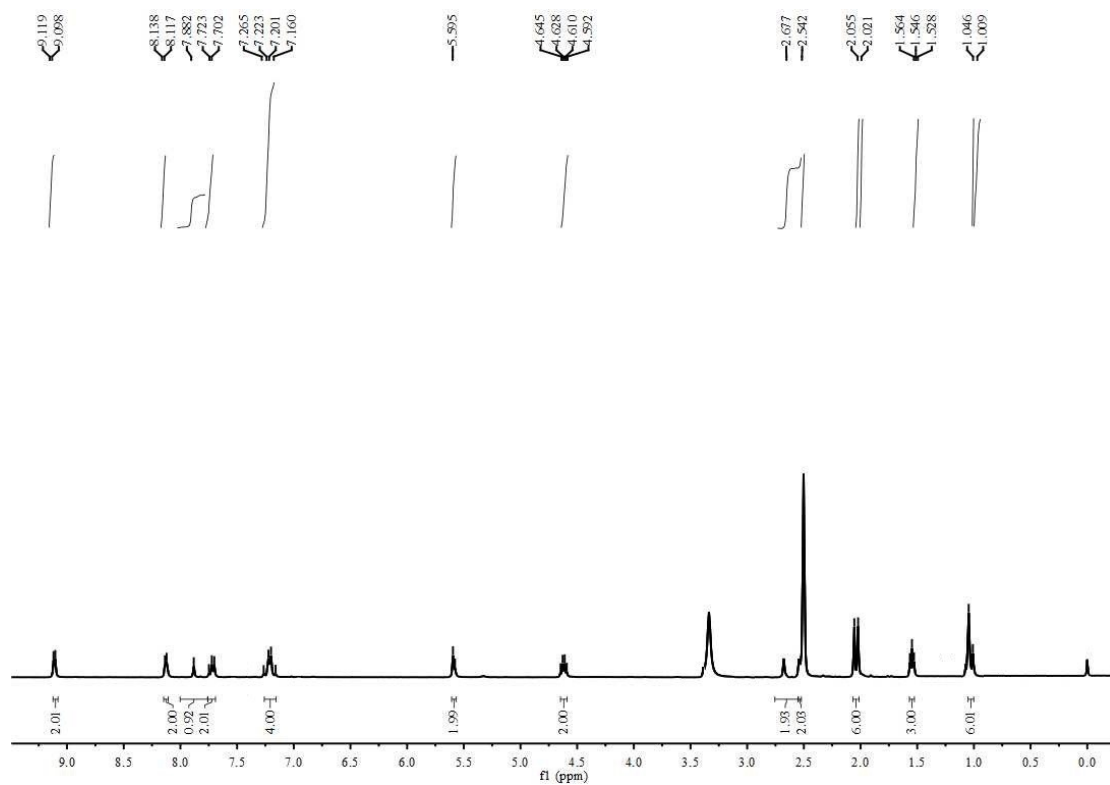

**Fig. S1**  $^1\text{H}$  NMR spectrum of PCPA (400 MHz,  $\text{DMSO-}d_6$ ).

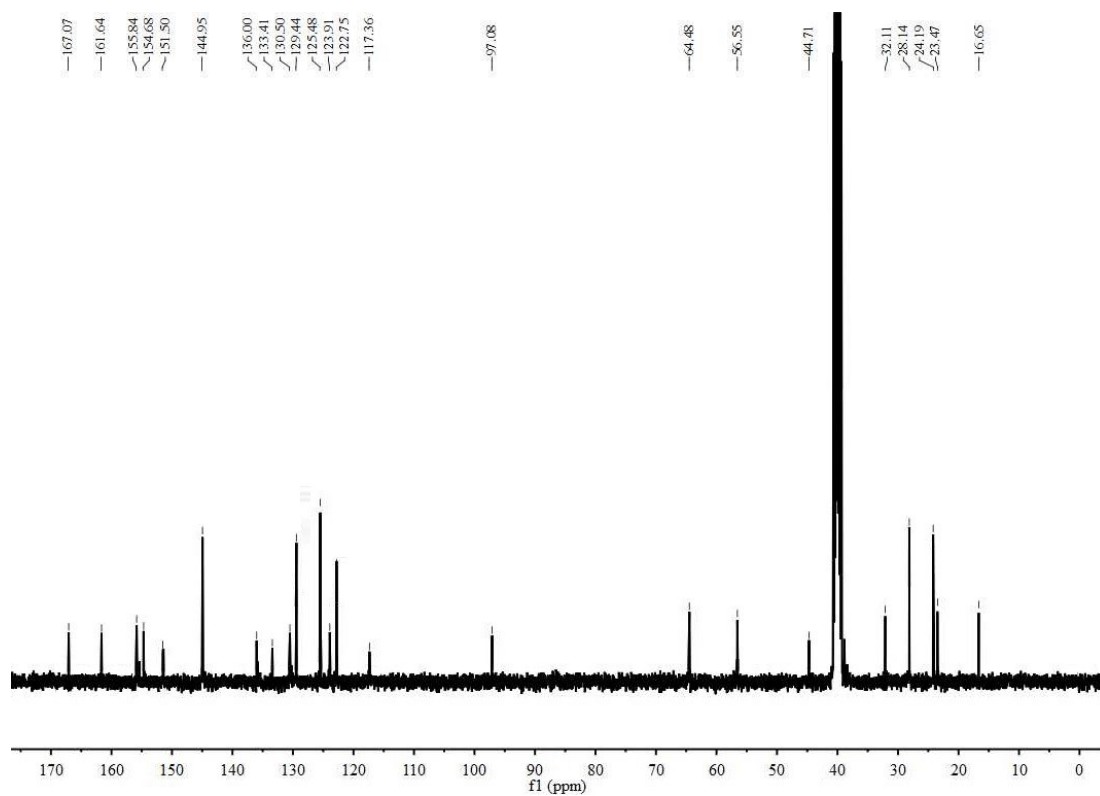

**Fig. S2**  $^{13}\text{C}$  NMR spectrum of PCPA (100 MHz,  $\text{DMSO-}d_6$ ).

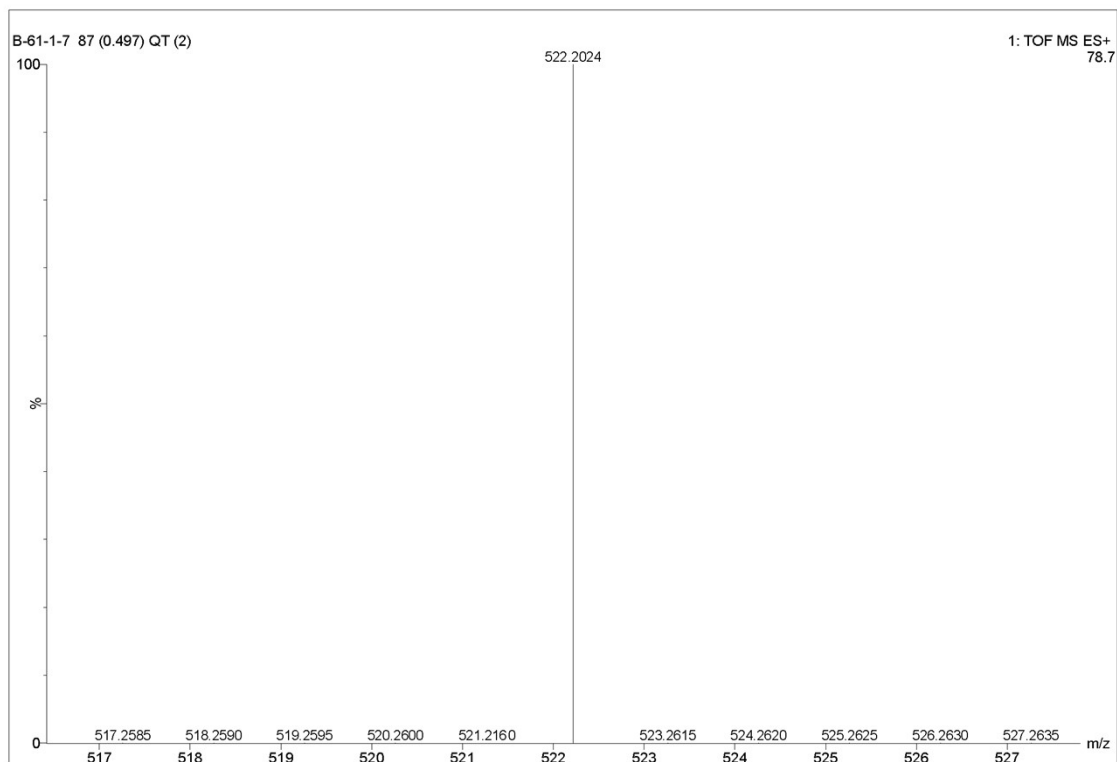

**Fig. S3** TOF-MS spectrum of PCPA.

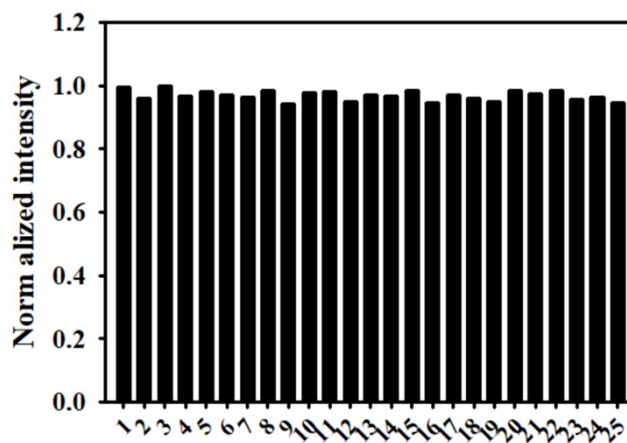

**Fig. S4** Fluorescence intensity of PCPA in the presence of ONOO<sup>-</sup> containing other analytes in PBS (20 mM, pH 7.4, 10% DMSO). (1) H<sub>2</sub>O<sub>2</sub>, (2) ClO<sup>-</sup>, (3) ONOO<sup>-</sup>, (4) NO, (5) <sup>1</sup>O<sub>2</sub>, (6) ·OH, (7) NO<sub>3</sub><sup>-</sup>, (8) TBHP, (9) O<sub>2</sub><sup>-</sup>, (10) HNO, (11) F<sup>-</sup>, (12) Cl<sup>-</sup>, (13) Br<sup>-</sup>, (14) I<sup>-</sup>, (15) Ac<sup>-</sup>, (16) SO<sub>3</sub><sup>2-</sup>, (17) S<sub>2</sub>O<sub>3</sub><sup>2-</sup>, (18) S<sup>2-</sup>, (19) Cys, (20) Hcy, (21) GSH<sup>-</sup>, (22) K<sup>+</sup>, (23) Mg<sup>2+</sup>, (24) Zn<sup>2+</sup>, (25) Al<sup>3+</sup>. λ<sub>ex</sub> = 445 nm, λ<sub>em</sub> = 645 nm.

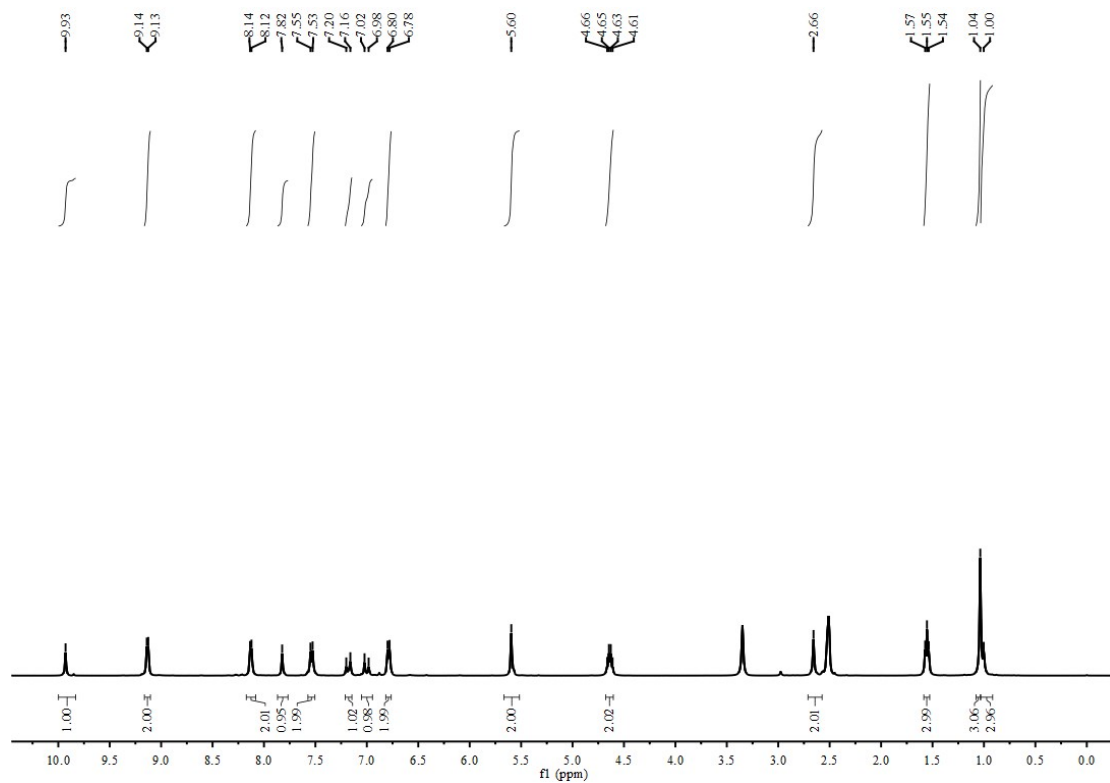

**Fig. S5**  $^1\text{H}$  NMR spectrum of PCPA +  $\text{ONOO}^-$ .

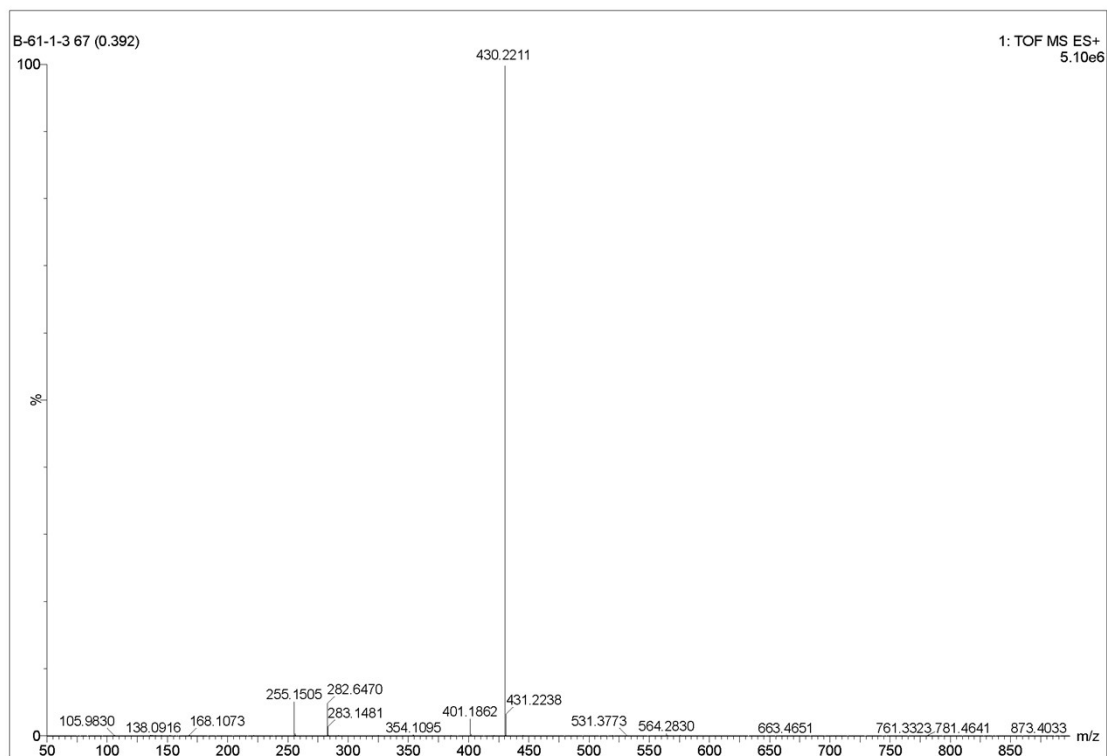

**Fig. S6** TOF-MS spectrum of PCPA +  $\text{ONOO}^-$ .

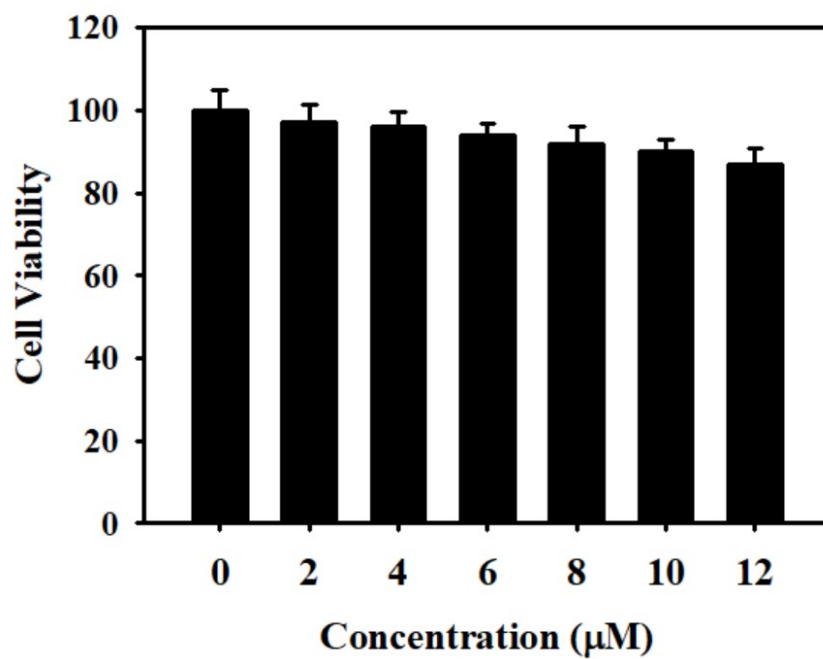

**Fig. S7** Cytotoxicity assays of PCPA with different concentrations (2, 4, 6, 8, 10 and 12 µM) in HeLa cells.
